# Supplementary material for: Cross Talk between Chemosensory Pathways That Modulate Chemotaxis and Biofilm Formation
Source: mBio. 2019 Feb 26;10(1):e02876-18. doi: 10.1128/mBio.02876-18 (PMC6391922; doi:10.1128/mBio.02876-18)
Supplement: FIG S3 [file mBio.02876-18-sf003.pdf]

M1 M2 M3  
 ACY34732.1/432-747 QSVAEGLDT--QEATVTEDITGAIDSVNYTVEELRALVGSVQNTVTRVAQTTEQVDVTSTELLA----ASNEQLHEIRETGKSIDLMAGRIN--NVSQAQESQAVARQSLQAA  
 ACY30779.1/232-562 LITAGGDLS-HRAEVS GKDELTDLQRALDQMQLSSTVQVRDASGNITATSAQEATNGNDLSA----RTEQTASNLQETVASLAQLTATVQ--QTASSQQLANQLAASASSTA  
 ACY31580.1/87-411 RTVAAGDLS-KEFSSNADEGFGRLLTALSAMEDTLVLGRIQKQSDLSLAYSAYEIDAGNINLS--RTEQVQSSALTETAASMEQLTIVTV--QNADRAHSSALLVATASATA  
 ACY32947.1/239-529 ERTVAGDGLT-ARIHVSSSDTEGQLMQALHDMNTSLDRIVGVQRGTQSDSIATASQGIATAGNHDLA--RTEEQASSLQETTAASMEQLSTVTV--QNADRAHSSANQLALASADVAA  
 ACY33729.1/237-602 QSAAGDLS-ASITVQSQDEVGVLQLALKDMNTSLQIRIVGVQRGTQSDSIATASQGIATAGNDQLS--RTEEQASSLQETTAASMEQLTATVQ--QNADNAQTANQMAASQAVAA  
 ACY32392.1/225-574 QVAAGRLG-MTVNRQRDEMDLLNLALEDMLRSLVSVQDVRGNAGHVALLASSETACQGNADLSA--RTEQASALLETTAASMEQLGSTVTV--QNADNAQTANQMAKNASDVA  
 ACY32393.1/224-589 DRVANGDLS-GVIRVEREDETGRLLGALERMQSSLVQTVRSVRQNAEAGVASASSQIASGNADLSG--RTEEQASALLETTAASMEQLGSTVTV--QNADNARAANQMAMNASQVA  
 ACY32747.1/224-577 NRVASGDLS-ASITSATSKDEMGILLGALERMQHSLVQTVSVRSNAGQVAAASQGIATAGNNDLSG--RTEEQASALLETTAASMEQLGSTVTV--QNAEHTAQNMAKSASVVA  
 ACY33669.1/224-577 DRVAGDLS-QGITVSKDETEGQLLSQRMQHSVSTVSVAIRNAQGVAGSQAQTAMGNNDLS--RTEEQASALLETTAASMEQLSATVTV--QNADNARQANQMAYNASSVA  
 ACY35461.1/202-494 RRVAGDGLT---GGSSSGMARGMLSDIQLTMRGALRELVRQVHGASVQMHASSETACQGNADLSA--RTEQASALLETTAASMEQLNATVTV--QNADSDAQTNRLQAASQVA  
 ACY31584.1/226-572 DSTAAGDGLT-ATVNRDRHDELGRLLKSLNMAERLSSVVGVRGSGVESVQSSAQGIATAGNDQLS--RTEQTAAANLETTAASMEQLTATVTV--QASDARTQANQLASTAAQAA  
 ACY33647.2/226-524 QIAAQDGLT-VTASNRDRHDELGRLLSSVSTMAQLRLSLVADVTVSGHSISTASAEIATGNHDLA--RTEQTAAANLETTAASMEQLTATVTV--QASDARTQANHLAGNAQAA  
 ACY34075.1/235-557 QTAAGDLSYAPAEERGDELQSLQSLALMTQRLGLVGEADVGEAFAAASQMAQNDLSLD--RTAHAAEQKLKATVSSIENMVTLLTV--HSDASARHADQASRAAEAA  
 ACY31701.1/231-518 ADVAAACNLS-TECSQSYSGAVGALMLRLQQIQLINLRVAVGVDVTVQGFQAQTAHEIAQSSFDLAG--RTESQATSLQQTAAASMEEISGTVS--QTADTAQFMAGASDESSKVA  
 ACY32751.1/227-536 NQLASGDLs-HVYRTGASGIGNLQRALFVLSVNLRTVLSVDVVRQVEGHLLEIAYREIASNGNSLS--RTTETQASSLEQTAAASMEQLNGTVH--NSALSASRGARFAEESAGIT  
 ACY33810.1/252-538 LNVATGNNR-QETYLQRSDEIGTLTQLNQLGFMRLWVDDVQNLVNMVQACNEIEQGNLSYHG--QTEQLAVNVAQTSASMEQITARTVQ--SSADTAQKAGVLASEASAA  
 ACY33088.1/78-497 EKVAHGDLS--MSAAKGAQAAATSGLTSMVHALSAMVADVAALVAQGGVMQKHQALSE--RTEMQASNLQATTVSVVQLSAAVQ--HSAEVSXAGHGRADVRSA  
 ACY34236.1/334-641 DATGHGDLS-RRMPVESNDEVGALASAFNRVSVSLERMVAVQRAQSDSIASVSESSAQGIATAGNDLSQ--RTEQASALQETTAASLSVLTDSVQ--ANTEAETRSAGELAQSGARGVA  
 ACY31592.1/208-474 HKLALGHHD-----AGQVLR-----IGKAGRVQIE-ASYNPILDAEGRFFVKVFATNITTSVTAQTLRTATVEGLTESANHARQANLEAQDCSVA  
 Con\_90% .t.lAtGphs.....t.t.h.h.t.h.h...h.tttptts...ht.sttphs...s...Lts.....potp.tttptTssTshststVp...psutpup.usthA.tuttsA  
 Con\_60% ppVAsgDLo.tphpspppEhGpLhupLpMpPsLpSlVupVrssspulAPAsspTAsGnpDLsU...RTEqQAssLcpTAAASMEQLStVp...QsA-sappANphApSApSlA  
 N22 N21 N20 N19 N16 N15 N14 N13 N12 N11 N10  
 abcdcfabgcbdfgabgcbdfgabgcbdf-----gabcdfgabgcbdfgabgcbdfab-----cdfgabgcbdfgabgcbdfga

[illegible]
