# Supplementary material for: Cross Talk between Chemosensory Pathways That Modulate Chemotaxis and Biofilm Formation
Source: PubMed Central journal article supplement (PMC6391922; doi:10.1128/mbio.02876-18), 2019-02-26

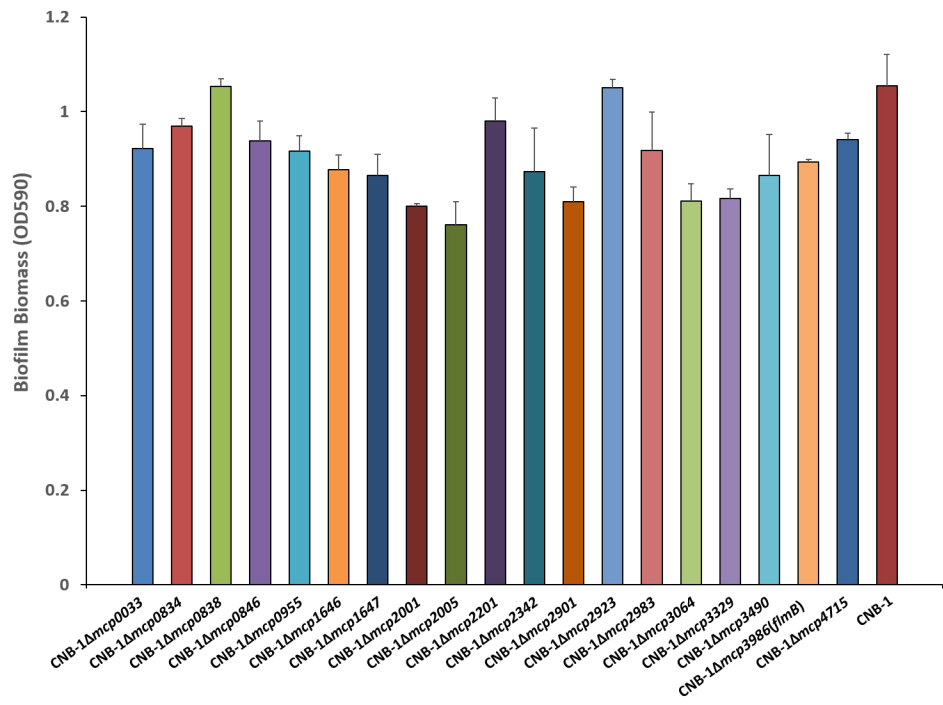

Supplement: mBio.02876-18-sf004.pdf [file mBio.02876-18-sf004.pdf]
