# Supplementary material for: Cross Talk between Chemosensory Pathways That Modulate Chemotaxis and Biofilm Formation
Source: PubMed Central journal article supplement (PMC6391922; doi:10.1128/mbio.02876-18), 2019-02-26
Supplement: mBio.02876-18-st002.pdf [file mBio.02876-18-st002.pdf]

| Gene cluster | Chemotaxis class | Gene name      | Accession  | Function           | M1 site | M2 site | M3 site | M4 site | Penta-peptide |
|--------------|------------------|----------------|------------|--------------------|---------|---------|---------|---------|---------------|
| <i>che</i>   | ND               | <i>cheY2</i>   | ACY31201.1 | response regulator |         |         |         |         |               |
|              | F7               | <i>cheZ</i>    | ACY31202.1 | phosphatase        |         |         |         |         |               |
|              | ND               | <i>cheY1</i>   | ACY31220.1 | response regulator |         |         |         |         |               |
|              | F7               | <i>cheA</i>    | ACY31221.1 | histidine kinase   |         |         |         |         |               |
|              | F7               | <i>cheW</i>    | ACY31222.1 | adaptor            |         |         |         |         |               |
|              | F7               | <i>cheR</i>    | ACY31223.1 | methyltransferase  |         |         |         |         |               |
|              | ND               | <i>cheD</i>    | ACY31224.1 | deamidase          |         |         |         |         |               |
|              | F7               | <i>cheB</i>    | ACY31225.1 | methylesterase     |         |         |         |         |               |
| <i>flm</i>   | Tfp              | <i>flmE</i>    | ACY34735.1 | response regulator |         |         |         |         |               |
|              | Tfp              | <i>flmD</i>    | ACY34734.1 | response regulator |         |         |         |         |               |
|              | Tfp              | <i>flmC</i>    | ACY34733.1 | adaptor            |         |         |         |         |               |
|              | 40H              | <i>flmB</i>    | ACY34732.1 | MCP                | no      | no      | no      | no      | no            |
|              | Tfp              | <i>flmA</i>    | ACY34731.1 | histidine kinase   |         |         |         |         |               |
| orphans      | 36H              | <i>MCP0033</i> | ACY30779.1 | MCP                | yes     | yes     | no      | yes     | no            |
|              | 36H              | <i>MCP0834</i> | ACY31580.1 | MCP                | yes     | no      | yes     | no      | no            |
|              | 36H              | <i>MCP0838</i> | ACY31584.1 | MCP                | yes     | yes     | yes     | yes     | yes           |
|              | ND               | <i>MCP0846</i> | ACY31592.1 | MCP                | no      | no      | no      | no      | no            |
|              | 36H              | <i>MCP0955</i> | ACY31701.1 | MCP                | no      | yes     | yes     | yes     | no            |
|              | 36H              | <i>MCP1646</i> | ACY32392.1 | MCP                | yes     | yes     | yes     | yes     | yes           |
|              | 36H              | <i>MCP1647</i> | ACY32393.1 | MCP                | yes     | yes     | yes     | yes     | yes           |
|              | 36H              | <i>MCP2001</i> | ACY32747.1 | MCP                | yes     | yes     | yes     | yes     | yes           |
|              | 36H              | <i>MCP2005</i> | ACY32751.1 | MCP                | no      | yes     | yes     | yes     | no            |
|              | 36H              | <i>MCP2201</i> | ACY32947.1 | MCP                | yes     | yes     | yes     | yes     | no            |
|              | 36H              | <i>MCP2342</i> | ACY33088.1 | MCP                | no      | no      | yes     | no      | no            |
|              | 36H              | <i>MCP2901</i> | ACY33647.2 | MCP                | yes     | yes     | yes     | yes     | no            |
|              | 36H              | <i>MCP2923</i> | ACY33669.1 | MCP                | yes     | yes     | yes     | yes     | yes           |
|              | 36H              | <i>MCP2983</i> | ACY33729.1 | MCP                | yes     | yes     | yes     | yes     | yes           |
|              | 36H              | <i>MCP3064</i> | ACY33810.1 | MCP                | yes     | no      | yes     | no      | no            |
|              | 36H              | <i>MCP3329</i> | ACY34075.1 | MCP                | no      | no      | no      | no      | no            |
|              | 36H              | <i>MCP3498</i> | ACY3498.1  | MCP                | yes     | yes     | no      | yes     | no            |
|              | 36H              | <i>MCP4715</i> | ACY35461.1 | MCP                | yes     | yes     | yes     | yes     | no            |
